# Supplementary material for: Flexibly funding WHO? An analysis of its donors’ voluntary contributions
Source: PubMed Central journal article supplement (PMC10083790; doi:10.1136/bmjgh-2022-011232), 2023-04-06
Supplement: bmjgh-2022-011232supp001.pdf [file bmjgh-2022-011232supp001.pdf]

**Supplemental file 1: Biennial WHO Funding Data, 2020-11 to 2020-21**

| <b>\$m*</b>                         | <b>2010-11</b> | <b>2012-13</b> | <b>2014-15</b> | <b>2016-17</b> | <b>2018-19</b> | <b>2020-21</b> |
|-------------------------------------|----------------|----------------|----------------|----------------|----------------|----------------|
| <b>AC approved</b>                  | 945            | 949            | 929            | 929            | 957            | 957            |
| <b>VC General Fund</b>              | 2899           | 3469**         | 3839           | 3828           | 4687           | 6989           |
| <b>VC Fiduciary Fund</b>            | 174            | 187            | 59             | 66             | 103            | 89             |
| <b>VC in-kind + in-service</b>      | 488            | 110            | 180            | 225            | 152            | 173            |
| <b>Program budget approved</b>      | 4540           | 3959           | 3977           | 4385           | 4422           | 5840           |
| <b>Program budget total revenue</b> | 3844           | 4418           | 4794           | 4755           | 5678           | 8004           |
| <b>WHO total revenue***</b>         | 4848           | 4675           | 5097           | 5139           | 6017           | 8365           |

\* Figures are rounded up, which accounts for small discrepancies with Fig 2.

\*\* Elimination of inter-fund transfers = \$3m, which accounts for discrepancy with Fig 2.

\*\*\* In addition to ACs and VCs from donors, additional sources of revenue to WHO include: beneficial exchange rates, rental income and fees for services.
