# Supplementary material for: Flexibly funding WHO? An analysis of its donors’ voluntary contributions
Source: PubMed Central journal article supplement (PMC10083790; doi:10.1136/bmjgh-2022-011232), 2023-04-06
Supplement: bmjgh-2022-011232supp002.pdf [file bmjgh-2022-011232supp002.pdf]

**Supplemental file 2: Donors ranked by the total value of VCs provided annually to WHO for the period 2010-21 (donor contribution as % of total value of VCs).**

|          | 2010-11          | 2012                | 2013             | 2014             | 2015              | 2016            | 2017                    | 2018              | 2019              | 2020                      | 2021               |
|----------|------------------|---------------------|------------------|------------------|-------------------|-----------------|-------------------------|-------------------|-------------------|---------------------------|--------------------|
| <b>1</b> | BMGF<br>(15.2%)  | BMGF<br>(17.0%)     | BMGF<br>(15.6%)  | USA<br>(14.9%)   | USA<br>(16.4%)    | USA<br>(18.6%)  | USA<br>(18.9%)          | USA<br>(12.5%)    | USA<br>(13.7%)    | Germany<br>(16.5%)        | Germany<br>(18.2%) |
| <b>2</b> | USA<br>(15%)     | USA<br>(13.7%)      | UK<br>(14.0%)    | BMGF<br>(12.8%)  | UK<br>(10.5%)     | BMGF<br>(15.8%) | BMGF<br>(15.3%)         | BMGF<br>(10.1%)   | Gavi<br>(9.4%)    | BMGF<br>(10.3%)           | BMGF<br>(11.3%)    |
| <b>3</b> | UK<br>(9.9%)     | UK<br>(7.4%)        | USA<br>(9.3%)    | UK<br>(7.7%)     | BMGF<br>(9.9%)    | UK<br>(7.7%)    | UK<br>(7.7%)            | UK (9.1%)         | BMGF<br>(9.3%)    | UK<br>(7.2%)              | US<br>(10.6%)      |
| <b>4</b> | Canada<br>(5.3%) | Canada<br>(6.1%)    | Gavi<br>(6.7%)   | Gavi<br>(6.4%)   | Gavi<br>(6.8%)    | Gavi<br>(4.3%)  | World<br>Bank<br>(6.9%) | Gavi<br>(7.0%)    | UK<br>(8.8%)      | EC<br>(6.7%)              | Gavi (7.3)         |
| <b>5</b> | Rotary<br>(4.0%) | Gavi<br>(5.9%)      | Canada<br>(6.3%) | Canada<br>(4.0%) | NPT<br>(4.7%)     | Japan<br>(3.9%) | Gavi<br>(6.3%)          | Germany<br>(6.8%) | EC (5.7%)         | Gavi<br>(5.1%)            | EC<br>(6.7%)       |
| <b>6</b> | Norway<br>(3.9%) | Australia<br>(4.2%) | Norway<br>(3.5%) | Rotary<br>(3.3%) | Nigeria<br>(3.6%) | NPT<br>(3.8%)   | Germany<br>(4.2%)       | UNOCHA<br>(6.0%)  | Germany<br>(5.6%) | Saudi<br>Arabia<br>(3.9%) | UK<br>(5.4%)       |

EC = European Commission; NPT = National Philanthropic Trust.

NB: The annex to audited financial statements provides annual rather than biennial VC data.
